# Supplementary material
Source: Springer Nature journal article supplement (https://www.springermedizin.de/resource/supplementary/12936_2010_1271_MOESM3_ESM.pdf/9549374)

### A. Rufiji

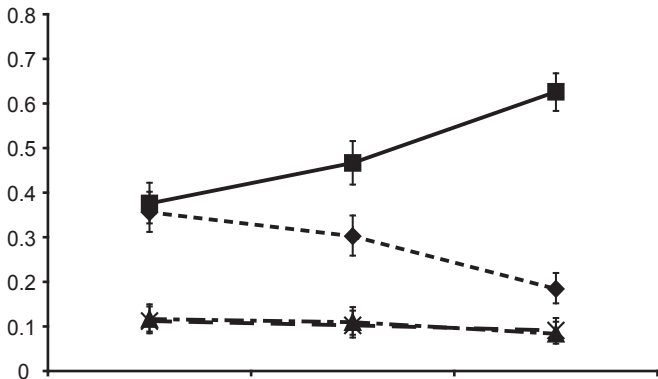

### B. Kilombero Ulanga

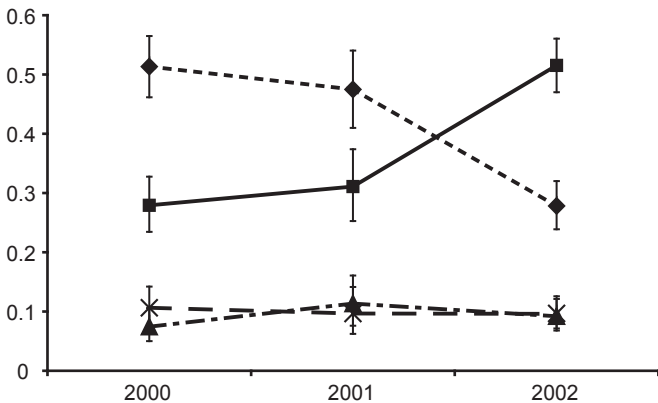

Supplement: MOESM3 [file 9549374]
